1 **Baltic *Methanosarcina* and *Clostridium* compete for electrons from metallic iron**

2

3 **Authors:** Paola Andrea Palacios Jaramillo<sup>1</sup>, Oona Snoeyenbos-West<sup>1,a</sup>, Carolin  
4 Regina Löscher<sup>1,3</sup>, Bo Thamdrup<sup>1</sup>, Amelia-Elena Rotaru<sup>1\*</sup>

5 **Affiliation:**

6 <sup>1</sup>Department of Biology, University of Southern Denmark, Odense, Denmark

7 <sup>2</sup>Danish Institute for Advanced Study, University of Southern Denmark, Odense,  
8 Denmark.

9 <sup>a</sup>Present address: Department of Microbiology and Molecular Genetics, Michigan  
10 State University, Michigan East Lansing, United States.

11 **\*Correspondence:** arotaru@biology.sdu.dk

12

13 **Abstract**

14 Microbial induced corrosion of steel structures, used for transport or storage of fuels,  
15 chemical weapons or waste radionuclides, is an environmental and economic threat.  
16 In non-sulfidic environments, the exact role of methanogens in steel corrosion is  
17 poorly understood. From the non-sulfidic, methanogenic sediments of the Baltic Sea  
18 corrosive communities were enriched using exclusively Fe<sup>0</sup> as electron donor and  
19 CO<sub>2</sub> as electron acceptor. Methane and acetate production were persistent for three  
20 years of successive transfers. *Methanosarcina* and *Clostridium* were attached to the  
21 Fe<sup>0</sup>, and dominated metagenome libraries. Since prior reports indicated  
22 *Methanosarcina* were merely commensals, consuming the acetate produced by  
23 acetogens, we investigated whether these methanogens were capable of Fe<sup>0</sup> corrosion  
24 without bacterial partners (inhibited by an antibiotic cocktail). Unassisted,  
25 methanogens corroded Fe<sup>0</sup> to Fe<sup>2+</sup> at similar rates to the mixed community.  
26 Surprisingly, in the absence of competitive bacteria, Baltic-*Methanosarcina* produced  
27 six times more methane than they did in the mixed community. This signifies that  
28 Baltic-*Methanosarcina* achieved better corrosion alone, exclusive of an operative  
29 bacterial partner. Our results also show that together with acetogens, *Methanosarcina*  
30 interact competitively to retrieve electrons from Fe<sup>0</sup> rather than as commensals as  
31 previously assumed.

32

33 **Keywords:** *Methanosarcina*, *Clostridium*, microbial induced corrosion, iron  
34 corrosion, electron uptake

## 35 INTRODUCTION

36 The Gulf of Bothnia of the Baltic Sea has been the dumping ground for chemical  
37 weapons and radionuclide waste sheltered by steel containers [1–3]. Thus, corrosion  
38 of metallic iron ( $\text{Fe}^0$ ) structures is a health and environmental threat. Microbial  
39 Induced Corrosion (MIC) accounts for 20% of total corrosion costs just when  
40 considering calamities and prevention for the oil and gas industries alone [4, 5]. MIC  
41 has been largely studied in marine environments (sulfide-rich) where sulfate-reducing  
42 bacteria cause rapid corrosion [6]. However, in non-sulfidic environments like the  
43 Bothnian Bay, corrosion of infrastructure may occur due to cooperative interactions  
44 between microorganisms such as methanogens and acetogens [7–11]. Microbial  
45 associations are critical to our understanding of MIC because cooperating partners  
46 apparently adapt and interact with  $\text{Fe}^0$  simultaneously, promoting corrosion rates  
47 above those they would induce as single species [12]. However the role of  
48 cooperative interactions in corrosion is understudied. Methanogens in general, and  
49 *Methanosarcina* in particular, were suggested to play an important role in corrosion,  
50 and were found associated with corroded structures from oil, gas, sewage water  
51 storage and transportation facilities [7–11], but also in aquifers where radionuclide-  
52 waste is stored underground [13].  
53 Nevertheless, very few highly corrosive methanogens have been described  
54 (*Methanococcus maripaludis* strains KA1, Mic1c10 and MM1264 and  
55 *Methanobacterium* strain IM1) yet none belongs to the genus *Methanosarcina*.  
56 Studies on corrosive *Methanococcus* and *Methanobacterium* methanogens indicated  
57 that their high corrosive potential could not be explained by the small amount of  $\text{H}_2$   
58 generated abiotically on  $\text{Fe}^0$  [14–18]. Consequently, the mechanisms proposed for  
59 these different methanogenic strains employed either 1) a direct uptake route [17, 19]  
60 or 2) an extracellular enzyme-mediated electron uptake [20, 21].  
61 First, direct electron uptake from  $\text{Fe}^0$  or electrodes has been suggested as an  
62 alternative to abiotic- $\text{H}_2$  uptake for *Methanobacterium* strain IM1 because:  
63 (1) It generated more methane from  $\text{Fe}^0$  than a  $\text{H}_2$ -utilizing *Methanococcus*  
64 *maripaludis* strain [19] with a low  $\text{H}_2$ -uptake threshold [22]  
65 (2) It produced methane using only a cathode poised at – 400mV under conditions  
66 unfavorable for abiotic  $\text{H}_2$  evolution [17].  
67 However, we do not know in what way IM1 reclaims electrons directly from  $\text{Fe}^0$  or  
68 electrodes, or if other methanogens have similar abilities.

69 By inference we propose that *Methanosarcina* might be able to retrieve electrons  
70 directly from Fe<sup>0</sup>. This is because we recently reported that *Methanosarcina barkeri*  
71 could retrieve electrons directly from a poised cathode at -400 mV under conditions  
72 unfavorable for abiotic H<sub>2</sub>-evolution [23]. The same *Methanosarcina* was previously  
73 shown to grow on Fe<sup>0</sup> (although assumedly using H<sub>2</sub>) [24] retrieve electrons from  
74 electrogenic syntrophic partners [25, 26] or via electrically conductive particles [27–  
75 29]. During the interaction of *Methanosarcina* with an electrogenic syntroph, the two  
76 are in an obligate metabolic cooperation with one another [26]. As such, only  
77 *Geobacter* is provided with an electron donor - ethanol, and the methanogen with an  
78 electron acceptor – CO<sub>2</sub>. *Geobacter* is a respiratory bacterium that demands an  
79 electron acceptor to oxidize ethanol [30, 31]. The electron acceptor may be  
80 extracellular (e.g. electrodes or cells [25]) then *Geobacter* uses their extracellular  
81 electron transfer machinery (outer membrane c-type cytochromes and electrically  
82 conductive pili [26, 32]). During their interaction with *Methanosarcina*, *Geobacter*  
83 uses the cell-surface of the methanogen as electron acceptor. The methanogen is also  
84 favored by the interactions because it can utilize the electrons to reduce CO<sub>2</sub> to  
85 methane. Only recently, plausible scenarios for direct electron uptake in  
86 *Methanosarcina* were substantiated using a comparative transcriptomic approach  
87 [33]. That study compared the transcriptome of *Methanosarcina* provided i) directly  
88 with electrons from an electrogen (*Geobacter*) or ii) with H<sub>2</sub> from a fermentative-  
89 *Pelobacter*. Several redox active cell-surface proteins were specifically up-regulated  
90 in the *Methanosarcina* grown via direct electron uptake but not via H<sub>2</sub>-uptake [34].  
91 However, the exact role of these cell-surface proteins in direct electron uptake by  
92 *Methanosarcina* is unidentified, and remains to be characterized.

93 The second described strategy for methanogens to reclaim electrons from Fe<sup>0</sup> is by  
94 using extracellular enzymes in order to effectively capture electrons [18, 35]. For  
95 effective electron recuperations, enzymes like hydrogenases, formate dehydrogenases  
96 or the heterodisulfide reductase supercomplex use Fe<sup>0</sup>-derived electrons to produce H<sub>2</sub>  
97 or formate [18, 35]. If an extracellular enzyme-dependent strategy would be useful in  
98 environmental-corrosive communities is yet to be determined. This is especially  
99 relevant, because, when sacrificial populations discharge extracellular enzymes they  
100 lead to enzymatic-H<sub>2</sub>/formate to be taken advantage off by unspecific and diverse  
101 H<sub>2</sub>/formate-utilizers. Moreover, outside the cell the stability of sensitive anaerobic

102 enzymes lasts for only a couple of days under stable conditions [36], but may be  
103 further stabilized by  $\text{Fe}^{2+}$  precipitation [37] released during the corrosion process.  
104 Because corroded infrastructure is often home to *Methanosarcina* species along with  
105 acetogenic genera, *Methanosarcina* was anticipated to play a role in  $\text{Fe}^0$ -corrosion,  
106 however it was assumed to be indirect [7–11], so it would require a cooperation with  
107 other corrosive microorganisms, for example by retrieving the acetate produced by  
108 acetogens while corroding  $\text{Fe}^0$  (Fig. 1). In this study we investigate the assumption  
109 that acetoclastic methanogens like *Methanosarcina* require an interaction with an  
110 acetogen in order to corrode  $\text{Fe}^0$ . The Bothnian Bay is an environment where  
111 corrosion could have tremendous environmental consequences. From the sediments,  
112 off the coast of Bothnia, we enriched for *Methanosarcina* on  $\text{Fe}^0$  [38]. A combination  
113 of scanning electron microscopy (SEM), high-throughput sequencing and  
114 physiological experiments was applied to investigate the role of methanogens and  
115 their interactions with co-occurring microbes in steel corrosion. We put forward  
116 evidence that Baltic-*Methanosarcina* can corrode  $\text{Fe}^0$  alone, competing with  
117 acetogens for access to  $\text{Fe}^0$ . Based on specific inhibition experiments, we propose  
118 different mechanisms for  $\text{Fe}^0$  corrosion for the Baltic *Clostridium*-acetogens and the  
119 *Methanosarcina*-methanogens.

120

## 121 MATERIALS AND METHODS

### 122 Baltic Enrichment cultures

123 Sediment cores were sampled during the summer of 2014 at 65°43.6'N and 22°26.8'E  
124 (station RA2) in the Bothnian Bay, Baltic Sea, at a 15 m water depth [38]. At the site  
125 the sediment had a temperature of 15°C and low in situ salinity of 0.5. The mineral  
126 content was low in insoluble manganese oxides, high in insoluble  $\text{FeS}$ , and high in  
127 crystalline iron oxides such as semiconductive goethite or conductive magnetite, as  
128 previously described [38].

129 Enrichment cultures were prepared using sediment from the methanogenic zone (30-  
130 36 cm) as previously described [38], but with the addition of 100 g/L iron granules,  
131 and removal of sulfide as reducing agent, which was instead replaced by an additional  
132 2 mM cysteine ( $c_f = 3$  mM). Subsequent transfers were prepared in 50 mL blue butyl-  
133 rubber-stoppered glass vials with an anoxic headspace of  $\text{CO}_2/\text{N}_2$  (20:80, v/v).

134 Samples were enriched in a DSM120 modified medium (modifications: 0.6g/L NaCl,  
135 without casitone, sodium acetate, methanol, or  $\text{Na}_2\text{S} \times 9\text{H}_2\text{O}$ ). Iron granules (99.98%,

136 ThermoFisher, Germany) and iron coupons (3 cm × 1 cm × 1 mm) were used as the  
137 only source of electrons and all the cultures were performed in triplicate and  
138 sometimes up to 10 replicates. Enrichments were transferred as soon as methane  
139 production reached stationary phase. Downstream analyses, DNA extractions,  
140 substrate evaluations, and SEM were performed during the fifth transfer after three  
141 years of consecutive enrichments only on Fe<sup>0</sup>. In addition, to confirm the presence or  
142 absence of methanogens, we used their natural, methanogen-specific autofluorescence  
143 due to coenzyme F<sub>420</sub> and visualized the cells via epifluorescence microscopy.

#### 144 **Chemical analyses**

145 Methane and H<sub>2</sub> concentrations were analyzed on a Trace 1300 gas chromatograph  
146 system (Thermo Scientific, Italy) coupled to a thermal conductivity detector (TCD).  
147 The injector was operated at 150°C and the detector at 200°C with 1.0 mL/min  
148 reference gas flow. The oven temperature was constant at 70°C. A TG-BOND Msieve  
149 5A column (Thermo Scientific; 30-m length, 0.53-mm i.d., and 20-μm film thickness)  
150 was used with argon as carrier gas with a set flow at 25 mL/min. The GC was  
151 controlled and automated by the Chromeleon software (Dionex, Version 7). With this  
152 set up, the detection limit for methane and H<sub>2</sub> was 5 μM.

153 Acetate concentrations were measured using a Dionex ICS-1500 Ion Chromatography  
154 System (ICS-1500) equipped with the AS50 autosampler, and an IonPac AS22  
155 column coupled to a conductivity detector (31 mA). For separation of volatile fatty  
156 acids, we used 4.5 mM Na<sub>2</sub>CO<sub>3</sub> with 1.4 mM NaHCO<sub>3</sub> as eluent. The run was  
157 isothermic at 30°C with a flow rate of 1.2 mL/min. Ferrous iron in the cultures was  
158 dissolved by 0.67 M HCl (containing 0.67 M hexamethylenetetramine to avoid  
159 dissolution of metallic iron) and quantified colorimetrically using the ferrozine assay  
160 [39].

#### 161 **DNA purification from microbial enrichments**

162 DNA purification was performed using a combination of two commercially available  
163 kits: MasterPure™ Complete DNA and RNA Purification Kit (Epicenter, Madison,  
164 WI, USA), and the Fast Prep spin MPtm kit for soil (Mobio/Quiagen, Hildesheim,  
165 Germany). 10 mL of the enrichment cultures were used for the DNA extraction,  
166 which started with the Epicenter kit with a modification to the manufacturer's  
167 protocol: a three-fold concentration of proteinase K was added to assure cell lysis, and  
168 a prolonged incubation time at 65°C was performed until the color of the samples  
169 changed from black to brown (brown pellet gave higher DNA extraction efficiencies).

170 Afterwards RNase treatment and protein precipitation were completed with the Fast  
171 Prep spin MP<sup>TM</sup> kit for soil. An advantage of this kit is that it allows removal of the  
172 high iron content, simultaneously with purifying DNA on a binding matrix. DNA  
173 quality was checked on an agarose gel, and quantification took place on a mySPEC  
174 spectrophotometer (VWR<sup>®</sup>, Germany).

### 175 **Metagenome analyses**

176 Metagenomic sequencing was performed via a commercially available service  
177 (Macrogen/ Europe), using an Illumina HiSeq2500 approach. Unassembled DNA  
178 sequences were merged, quality checked, and annotated using the Metagenomics  
179 Rapid Annotation (MG-RAST) server (vs. 4.03) with default parameters [40].  
180 Illumina sequencing resulted in 10,739 high-quality reads of a total of 10,749 with an  
181 average length of 167 bp. For taxonomic analyses, the metagenomic data was  
182 compared with the Silva [41], RDP [42], Greengenes [43] and RefSeq [44] databases  
183 available in MG-RAST. The obtained rarefaction curve indicated that the prokaryotic  
184 diversity was well covered in these samples (data not shown). Deeper analyses into  
185 the microbial community structure were performed at different phylogenetic levels  
186 down to the genus level. To investigate genes involved in carbon fixation in  
187 prokaryotes and in methanogenesis, sequences were compared against the KEGG  
188 Orthology (KO) reference database. Both taxonomic and functional analyses were  
189 performed with the following cutoff parameters: e-value of 1E-5, a minimum identity  
190 of 60%, and a maximum alignment length of 15 bp. The metagenome data are  
191 available at MG-RAST with this ID: xxxxx.

### 192 **16S rDNA sequence analyses**

193 Archaeal primers ARC-344F (5'-ACGGGGCGCAGCAGGCGCGA-3') [45] and  
194 ARC-1059R (5'GCCATGCACCWCTCT-3') [46] were used to perform PCR  
195 amplification from the isolated DNA. PCR reactions were carried in a final volume of  
196 50 µL, which contained 1.5 mM MgCl<sub>2</sub>, 0.2 mM dNTPs, 0.2 µM of each primer, and  
197 1U Taq Polymerase Promega and was completed with TE buffer. PCRs were carried  
198 out with an initial denaturation step at 94°C for 10 min; then 35 cycles of denaturation  
199 at 94°C for 30 sec, annealing at 55°C for 30 sec, extension at 72°C for 90 sec and a  
200 final extension cycle at 72°C for 10 min. 16S PCR products were cloned with the  
201 TOPO<sup>®</sup> TA Cloning<sup>®</sup> Kit for Sequencing (Invitrogen, Carlsbad, CA, USA). PCR  
202 products were sent to Macrogen Inc. (Seoul, South Korea) for Sanger sequencing  
203 using the M13F primer. Sequences were analyzed using the Geneious<sup>®</sup> software

204 package, version 11.0.4 [47]. Sequences were compared against the NCBI GenBank  
205 DNA database using BLAST.

206 A consensus sequence for the Baltic-*Methanosarcina* sequences was assembled from  
207 four specific 300-600 bp sequences using ClustalW within Geneious. This consensus  
208 sequence was used to construct a maximum likelihood phylogenetic tree alongside  
209 other methanogens and a Baltic-*Methanosarcina* retrieving electrons from a Baltic-  
210 Geobacter via conductive particles [38]. Sequences were deposited in GenBank under  
211 the accession number: xxxxxx.

### 212 **Scanning electron microscopy**

213 Iron specimens were fixed with 2.5% (v/v) glutaraldehyde in 0.1 M phosphate buffer  
214 (pH 7.3) at 4°C for 12 h, washed in phosphate buffer, dehydrated with anoxic ethanol  
215 at increasing concentrations (35%, 50%, 70%, 80%, 90%, 95%, 100%, and 3 times in  
216 100% v/v; each step for 10 min.), then pre-dried with hexamethyldisilazane for  
217 30 min.; [48] and dried under N<sub>2</sub>. Scanning electron microscopy (SEM) was  
218 performed with a FESEM Magellan 400 at 5.0 kV at the microscopy facility of the  
219 University of Massachusetts, Amherst.

### 220 **Removal of corrosion crust**

221 Corrosion crusts from the iron coupons were removed with inactivated acid (10%  
222 hexamine in 2M HCl) [6]. N<sub>2</sub> gas stream was used to dry the iron coupons, which  
223 were anaerobically stored for microscopy.

224

## 225 **RESULTS AND DISCUSSION**

226 To determine if methanogenic communities from costal environments stimulate Fe<sup>0</sup>  
227 corrosion we enriched for methanogenic communities from sediments offshore of the  
228 Swedish coast of the Baltic Sea. For three years we provided a Baltic methanogenic  
229 community with Fe<sup>0</sup> as sole electron donor and CO<sub>2</sub> as sole electron acceptor.  
230 Original slurries (25% sediment) from Baltic sediments when provided with Fe<sup>0</sup> they  
231 generated circa five times more methane and four times more acetate than incubations  
232 without Fe<sup>0</sup> (Fig. 2). Methane and acetate production continued in subsequent  
233 transfers only when Fe<sup>0</sup> was added as sole electron donor. After three transfers,  
234 incubations became sediment-free. In these sediment-free incubations, we noticed the  
235 formation of a black crust, which could not be observed in abiotic incubations (Fig.  
236 2). Previously, black crust was observed under non-sulfidic conditions and classified  
237 as siderite, a common corrosion product of freshwater-microorganisms using CO<sub>2</sub> as

238 terminal electron acceptor [49]. At transfer eight, we assessed Fe<sup>0</sup> corrosion, by  
239 determining ferrous (Fe<sup>2+</sup>) iron accumulation (Fig. 2), which is presumably generated  
240 in equimolar amounts to the Fe<sup>0</sup> consumed ( $\text{Fe}^0 + 2\text{H}_2\text{O} \rightarrow \text{Fe}^{2+}(\text{OH})_2 + 2\text{H}^+ + 2\text{e}^-$ ), if  
241 Fe<sup>2+</sup>-precipitation is absent. Over the course of 25 days, the methanogenic community  
242 produced twice the amount of Fe<sup>2+</sup> ( $1.08 \pm 0.1 \text{ mM Fe}^{2+}$ ) compared to abiotic controls  
243 ( $0.55 \pm 0.08 \text{ mM Fe}^{2+}$ ). Corrosion by the Baltic community was steady and significant  
244 ( $p < 0.0003$ ,  $n > 5$ ), since corrosion started immediately and Fe<sup>2+</sup> accumulated  
245 constantly above abiotic controls through the incubation. Largest difference was  
246 observed during the first five days, when Fe<sup>2+</sup> was detectable only in the presence of  
247 an active community ( $42 \pm 13 \text{ } \mu\text{M/day}$ ), while it was below background in abiotic  
248 incubations ( $< 0 \pm 9 \text{ } \mu\text{M/day}$ ).

249 To determine cell types and attachment onto the metal, we carried out SEM of Fe<sup>0</sup>  
250 coupons before and after three months exposure to an active Baltic community. Three  
251 major morphotypes were observed attached to the Fe<sup>0</sup>-coupons, a sarcina-like, a  
252 vibrio-like and rods with bulging heads, likely endospores (Fig. 3). These  
253 morphotypes resemble morphologies of *Methanosarcina*, *Desulfovibrio* and  
254 *Clostridium*, respectively.

255 Whole genome-based phylogenetic analyses confirmed the presence of all three  
256 groups in the corrosive enrichment (Fig. 4). There was only one dominant archaea  
257 genus, namely *Methanosarcina* (83% of all archaea; 11% of all prokaryotes). The  
258 most abundant bacterial genus was *Clostridium* (20% of all bacteria; 17% of all  
259 prokaryotes) followed by *Desulfovibrio* (6.4% of all bacteria; 5.5% of all  
260 prokaryotes). Moreover, *Methanosarcina* was the most abundant methanogen in the  
261 original sediment from the Baltic Sea, as determined by 16S-rDNA MiSeq tag-  
262 sequencing and quantitative PCR [38]. On the other hand, *Clostridium* was a minority  
263 in the Baltic methanogenic community (<1%), and *Desulfovibrio* was undetected by  
264 16S-rDNA MiSeq of the original community [38].

### 265 **Alleged commensalism between *Methanosarcina* and acetogens**

266 The dominance of acetogenic *Clostridium*, and acetoclastic *Methanosarcina* led us to  
267 the hypothesis that *Clostridium* and *Methanosarcina* were commensals on Fe<sup>0</sup> with  
268 *Clostridium* using Fe<sup>0</sup> as electron donor for acetogenesis, followed by the acetate  
269 being used as food source by methanogens (Fig. 1). Thus, we expected *Clostridium* to  
270 utilize H<sub>2</sub>/or electrons directly from Fe<sup>0</sup> and generate acetate. Few *Clostridium*  
271 species have been described to function as acetogens, like for example *Clostridium*



272 *ljungdahlii* [50]. Acetogens are associated with corroded structures, and suggested to  
273 play a direct role in corrosion of Fe<sup>0</sup> [7, 8]. The acetate generated by acetogens is a  
274 favorable food source for *Methanosarcina* — which would then metabolize acetate to  
275 produce methane and CO<sub>2</sub> [51]. Thus, we anticipated that *Clostridium* and  
276 *Methanosarcina* live as commensals, with only the *Methanosarcina* profiting from the  
277 interaction (Fig. 1). *Methanosarcina* have been expected to play a secondary indirect  
278 role in steel corrosion [7–11]. Surprisingly, in our incubations acetate accumulated  
279 (Fig. 2), indicating that Baltic-*Methanosarcina* were ineffective acetate-utilizers.  
280 Instead they seem to use Fe<sup>0</sup> as electron donor.

### 281 **Competition for Fe<sub>0</sub> between methanogens and acetogens**

282 To verify whether the Baltic *Methanosarcina* was an ineffective acetoclastic  
283 methanogen we tested its phylogenetic affiliation to a non-acetoclastic  
284 *Methanosarcina*, tested for acetate utilization, and carried out inhibition experiments  
285 in order to either block methanogenesis or acetogenesis. Corroborating our  
286 observations we determined that Baltic-*Methanosarcina*, could not utilize acetate, and  
287 therefore together with Baltic-acetogens they established a competitive-type of  
288 interaction, rather than a commensal-type of interaction.

289 To determine whether the methanogen was related to a non-acetoclastic  
290 *Methanosarcina* we carried out phylogenetic analyses of the 16S rRNA gene. The  
291 Baltic-*Methanosarcina* 16S rRNA-gene sequence showed 100% identity (600 bp  
292 fragment) to *M. lacustris* (Fig. 5), which unlike other *Methanosarcina*, cannot utilize  
293 acetate [52]. Once the Baltic-methanogenic community was incubated with acetate as  
294 sole electron donor, methane was untraceable for the entire incubation period, of 60  
295 days.

296 Inhibition of the bacterial community comprising acetogens, led to a two to six fold  
297 increase in methane-production (Fig. 6) compared to the mixed acetogen-methanogen  
298 community (Fig. 6). In the absence of acetogens (day 10-15), methanogenesis rates  
299 were higher (0.094 ± 0.018 mM/day methane) than in the mixed community (0.016 ±  
300 0.005 mM/day methane). Antibiotics (kanamycin and ampicillin) did wear off after 15  
301 days, resulting in a small increase in acetate production (Fig. 6), and a halving of the  
302 methanogenic rates due to the detrimental presence of ‘*undead*’-acetogens. Higher  
303 methanogenic rates when acetate-producing bacteria are incapacitated (or less active)  
304 indicate that acetogenic bacteria competitively inhibit the methanogens.

305 Furthermore, to determine whether acetogens were negatively impacted by  
306 methanogens we inhibited the methanogenic community with 2-  
307 bromoethanesulfonate (BES), a methyl-CoA analogue. Using BES as inhibitor, the  
308 methanogenic community was rendered inactive for the entire period of the  
309 incubation (Fig. 6). Acetogens alone were significantly more productive (14%;  
310  $p < 0.0001$ ) than acetogens in the mixed community. Therefore we could conclude that  
311 within the mixed community methanogens did pilfer access to  $Fe^0$  from acetogens in  
312 their struggle to survive (Fig. 6). Thus both, acetogens and methanogens were  
313 negatively affecting one another when competing for  $Fe^0$  as sole electron donor (Fig.  
314 7).

315 Here, for the first time, we bring evidence that an environmental *Methanosarcina* is  
316 directly involved in  $Fe^0$  corrosion. Plus our results show that methanogenic activity in  
317 a *Methanosarcina* dominant Baltic community does not depend on the bacteria or the  
318 substrates they generate. Our results are contesting previous suppositions that  
319 *Methanosarcina* and acetogens mainly interact syntrophically, via acetate-transfer,  
320 within a corrosive community [53].

### 321 **Mechanisms of electron uptake from $Fe^0$**

322 Acetogens have been credited to use a variety of mechanisms for electron uptake from  
323  $Fe^0$  including uptake of abiotic  $H_2$  [54], uptake of enzymatically evolved  $H_2$  [35, 55]  
324 or direct-electron uptake. The later is a possibility inferred from the property of some  
325 acetogens to grow on electrodes under non-hydrogenotrophic conditions [50, 56,  
326 57].

327 Here we demonstrate, that Baltic-acetogens are most likely using oozed endogenous  
328 enzymes for quick retrieval of electrons from  $Fe^0$ . This was similar to earlier studies,  
329 which investigated pure culture acetogens corroding  $Fe^0$ , such as *Sporomusa* or  
330 *Acetobacterium* strains [35, 54].

331 In our study, acetogenesis started 5 days earlier when we added a filtrate of spent-  
332 media from a  $Fe^0$ -grown Baltic community (Fig. 8). Plus, acetate recoveries were  
333 higher at the addition of the spent filtrate (Fig. 8). We observed that accumulation of  
334 acetate increased by 22% ( $n=10$ ,  $p < 0.00001$ ) compared to the mixed Baltic  
335 community, and by 7% ( $n=10$ ,  $p < 0.02$ ) compared to Baltic-acetogens alone, after  
336 inhibiting their competitors, the methanogens. We conclude that Baltic-acetogens are  
337 most likely to use a mechanism of electron uptake from  $Fe^0$  mediated by enzymes  
338 similar to other acetogens [35, 54]. In the Baltic corrosive community *Clostridium*-

339 species are likely to play the role of acetogens, since several species have been shown  
340 to produce acetate either by electrosynthesis of autotrophically on H<sub>2</sub> [50, 58, 59].  
341 Besides, clostridial enzymes, for example [Fe]-hydrogenases from *Clostridium*  
342 *pasteurianum*, were shown capable of corrosion on their own, assumedly by direct  
343 retrieval of electrons coupled to proton reduction to H<sub>2</sub> [60, 61]. *If* a sacrificial  
344 population exuded enzymes, *then* the addition of spent-media filtrate, expected to  
345 contain exuded enzymes, would significantly stimulate H<sub>2</sub>-production and subsequent  
346 H<sub>2</sub>-uptake by Baltic-acetogens. This was not the case, as indicated by comparable H<sub>2</sub>-  
347 concentrations in incubations with Baltic-acetogens with or without additional  
348 endogeneous enzymes from spent-filtrate (1.3 ± 0.5 mM versus 1.6 ± 0.4 mM  
349 respectively; n=10; p=0.4).

350 On the other hand, methanogens showed a 23% drop in methane productivity (n=10,  
351 p<0.03; Fig. 8) at the addition of Fe<sup>0</sup> spent media filtrate as compared to the mixed  
352 Baltic community. It is therefore unlikely that *Methanosarcina* is using an enzymatic-  
353 mediated electron uptake mechanism. These data were also corroborated with a  
354 previous study on Baltic-*Methanosarcina* capable of mineral-syntrophy independent  
355 of enzyme, as it remained unaffected by spent filtrate additions [38].

356 Although it has been suggested that enzyme-mediated corrosion may occur in  
357 methanogens, this property has only been demonstrated for *Methanococcus*-species  
358 [35, 55]. Initial studies looking at *Methanosarcina*'s ability to corrode Fe<sup>0</sup> assumed  
359 these methanogens were using abiotic H<sub>2</sub>. Nevertheless, *Methanosarcina* have high  
360 H<sub>2</sub>-uptake thresholds (296 nM - 376 nM) [62, 63], and *Methanosarcina* should  
361 theoretically be outcompeted by other methanogens with lower H<sub>2</sub>-uptake thresholds  
362 (e.g. circa 6 nM for *Methanobacterium formicicum* [62, 63]). This is not the case.  
363 *Methanosarcina* are often found associated with Fe<sup>0</sup> corrosion rather than  
364 hydrogenotrophic methanogens with lower H<sub>2</sub>-tresholds. Plus in our system, Baltic-  
365 *Methanosarcina* did not benefit from spent-filtrate addition, which is expected to  
366 include hydrogenase enzymes [35, 54]. Instead, Baltic-*Methanosarcina* may be  
367 directly reclaiming electrons from Fe<sup>0</sup> as they do from other cells [25, 26] or  
368 conductive particles [25, 29, 38], consequently stealing electrons from competing H<sub>2</sub>-  
369 utilizers, methanogens or acetogens, within a corrosive community. The mechanism  
370 of direct electron uptake in *Methanosarcina* has been only recently challenged using a  
371 comparative transcriptomics approach of *Methansarcina* provided with electrons  
372 directly from a current-producing syntrophic partner (*Geobacter* [25, 26]) or with H<sub>2</sub>

373 from a H<sub>2</sub>-producing syntrophic partner (*Pelobacter*). For a direct-type of interaction,  
374 it was previously shown that *Methanosarcina* up-regulates cell-surface proteins with  
375 redox properties such as cupredoxins, cytochromes and other Fe-S-proteins [34].  
376 However, the exact role of these redox-active proteins in how *Methanosarcina*  
377 retrieves electrons from solid extracellular electrons donors (Fe<sup>0</sup>, other cells or,  
378 electrically conductive particles) remains enigmatic and deserves future exploration.

379

## 380 **CONCLUSION**

381 *Methanosarcina* and acetogens are often found on corroded Fe<sup>0</sup>-structures in non-  
382 sulfidic environments. However, the role of *Methanosarcina* was assumed to be rather  
383 secondary, as a commensal feeding on the acetate produced by acetogens implicated  
384 directly in corrosion. Here we investigate a corrosive methanogenic community from  
385 the Baltic Sea, where steel corrosion of chemical weapons, radionuclide waste  
386 containers and pipeline structures are an economic and environmental threat.

387 *Clostridium*-acetogens and *Methanosarcina*-methanogens dominated the corrosive  
388 Baltic Sea community. Our results demonstrated that Baltic-*Methanosarcina* does not  
389 establish a syntrophic interaction with the acetogens as often reported. Instead,  
390 *Methanosarcina* and the acetogens compete with each other to reclaim electrons from  
391 Fe<sup>0</sup>. While Baltic acetogens seem to use endogenous enzymes, *Methanosarcina* were  
392 not. We suggest Baltic-*Methanosarcina* may be retrieving electrons directly via a  
393 mechanism that is largely unexplored.

394

## 395 **AUTHOR CONTRIBUTIONS**

396 PAP and AER designed the experiments. AER carried out the sampling, and  
397 processing of the Baltic sediment as well as the original incubations with help from  
398 BT. PAP carried all downstream growth experiments and analyses. PAP did all  
399 molecular experiments and analyses with support from OSW and CL. PAP and AER  
400 wrote the manuscript and all authors contributed to the final version of the  
401 manuscript.

402

## 403 **ACKNOWLEDGMENTS**

404 This is a contribution to a Sapere Aude Danish Research Council grant number 4181-  
405 00203 awarded to AER. We would like to thank Lasse Ørum Smidt, Erik Laursen,  
406 and Heidi Grøn Jensen who were instrumental with lab assistance through the project.

407 We thank for assistance Joy Ward and the microscopy facility unit at the University of  
408 Massachusetts Amherst who assisted us with scanning electron microscopy.

409

## 410 REFERENCES

- 411 1. Medvedeva N, Polyak Y, Kankaanpää H, Zaytseva T. Microbial responses to  
412 mustard gas dumped in the Baltic Sea. *Mar Environ Res* 2009; **68**: 71–81.
- 413 2. Rajala P, Carpén L, Vepsäläinen M, Raulio M, Sohlberg E, Bomberg M.  
414 Microbially induced corrosion of carbon steel in deep groundwater  
415 environment. *Front Microbiol* 2015; **6**: 1–13.
- 416 3. Tornero V, Hanke G. Chemical contaminants entering the marine environment  
417 from sea-based sources: A review with a focus on European seas. *Mar Pollut*  
418 *Bull* 2016; **112**: 17–38.
- 419 4. Alabbas FM, Bhola R, Spear JR, Olson DL, Mishra B. Electrochemical  
420 Characterization of Microbiologically Influenced Corrosion on Linepipe Steel  
421 Exposed to Facultative Anaerobic *Desulfovibrio* sp. *Int J Electrochem Sci*  
422 2013; **8**: 859–871.
- 423 5. Hays GF. World Corrosion Organization - CORRODIA - NACE European  
424 Board. 2010.
- 425 6. Enning D, Garrelfs J. Corrosion of iron by sulfate-reducing bacteria: new views  
426 of an old problem. *Appl Environ Microbiol* 2014; **80**: 1226–36.
- 427 7. Kato S, Yumoto I. Isolation of Acetogenic Bacteria That Induce Biocorrosion  
428 by Utilizing Metallic Iron as the Sole Electron Donor. *Appl Environ Microbiol*  
429 2015; **81**: 67–73.
- 430 8. Mand J, Park HS, Jack TR, Voordouw G. The role of acetogens in microbially  
431 influenced corrosion of steel. *Front Microbiol* 2014; **5**: 1–14.
- 432 9. Frank Y, Banks D, Avakian M, Antsiferov D, Kadychagov P, Karnachuk O.  
433 Firmicutes is an Important Component of Microbial Communities in Water-  
434 Injected and Pristine Oil Reservoirs, Western Siberia, Russia. *Geomicrobiol J*  
435 2016; **33**: 387–400.
- 436 10. Zhang T, Fang HHP, Ko BCB. Methanogen population in a marine biofilm  
437 corrosive to mild steel. *Appl Microbiol Biotechnol* 2003; **63**: 101–106.
- 438 11. Zhu XY, Lubeck J, Kilbane II JJ. Characterization of Microbial Communities  
439 in Gas Industry Pipelines. *Appl Environ Microbiol* 2003; **69**: 5354–5363.
- 440 12. Lee JS, McBeth JM, Ray RI, Little BJ, Emerson D. Iron cycling at corroding

- 441 carbon steel surfaces. *Biofouling* 2013; **29**: 1243–1252.
- 442 13. Bomberg M, Nyysönen M, Itävaara M. Characterization of Olkiluoto Bacterial  
443 and Archaeal Communities by 454 Pyrosequencing. 2012.
- 444 14. Dinh HT, Kuever J, Mussmann M, Hassel AW, Stratmann M, Widdel F. Iron  
445 corrosion by novel anaerobic microorganisms. *Nature* 2004; **427**: 829–32.
- 446 15. Mori K, Tsurumaru H, Harayama S. Iron corrosion activity of anaerobic  
447 hydrogen-consuming microorganisms isolated from oil facilities. *J Biosci*  
448 *Bioeng* 2010; **110**: 426–430.
- 449 16. Uchiyama T, Ito K, Mori K, Tsurumaru H, Harayama S. Iron-corroding  
450 methanogen isolated from a crude-oil storage tank. *Appl Environ Microbiol*  
451 2010; **76**: 1783–8.
- 452 17. Beese-Vasbender PF, Grote J-P, Garrelfs J, Stratmann M, Mayrhofer KJJ.  
453 Selective microbial electrosynthesis of methane by a pure culture of a marine  
454 lithoautotrophic archaeon. *Bioelectrochemistry* 2015; **102**: 50–55.
- 455 18. Lienemann M, Deutzmann JS, Milton RD, Sahin M, Spormann AM. Mediator-  
456 free enzymatic electrosynthesis of formate by the *Methanococcus maripaludis*  
457 heterodisulfide reductase supercomplex. *Bioresour Technol* 2018; **254**: 278–  
458 283.
- 459 19. Dinh HT, Kuever J, Mußmann M, Hassel AW, Mussman M, Hassel AW, et al.  
460 Iron corrosion by novel anaerobic microorganisms. *Nature* 2004; **427**: 829–  
461 832.
- 462 20. Jörg D, Spormann AM. Extracellular Enzymes Facilitate Electron Uptake in  
463 Biocorrosion and Bioelectrosynthesis. *MBio* 2015; **6**: 1–8.
- 464 21. Tsurumaru H, Ito N, Mori K, Wakai S, Uchiyama T, Iino T. An extracellular [   
465 NiFe ] hydrogenase mediating iron corrosion is encoded in a genetically  
466 unstable genomic island in *Methanococcus maripaludis*. *Sci Rep* 2018; **8**: 1–10.
- 467 22. Briley KA, Connolly JM, Downey C, Gerlach R, Fields MW. Taxis toward  
468 hydrogen gas by *methanococcus maripaludis*. *Sci Rep* 2013; **3**: 1–8.
- 469 23. Yee MO, Snoeyenbos-west O, Thamdrup B, Ottosen LDM, Rotaru A.  
470 Extracellular electron uptake by two *Methanosarcina* species. *bioRxiv* 2018; 1–  
471 33.
- 472 24. Boopathy R, Daniels L. Effect of pH on Anaerobic Mild Steel Corrosion by  
473 Methanogenic Bacteria. *Appl Envir Microbiol* 1991; **57**: 2104–2108.
- 474 25. Rotaru A-E, Woodard TL, Nevin KP, Lovley DR. Link between capacity for

- 475 current production and syntrophic growth in *Geobacter* species. *Front*  
476 *Microbiol* 2015; **6**: 744.
- 477 26. Rotaru A-E, Shrestha PM, Liu F, Markovaite B, Chen S, Nevin KP, et al.  
478 Direct interspecies electron transfer between *Geobacter metallireducens* and  
479 *Methanosarcina barkeri*. *Appl Environ Microbiol* 2014; **80**: 4599–605.
- 480 27. Liu F, Rotaru A-E, Shrestha PM, Malvankar NS, Nevin KP, Lovley DR.  
481 Promoting direct interspecies electron transfer with activated carbon. *Energy*  
482 *Environ Sci* 2012; **5**: 8982.
- 483 28. Chen S, Rotaru A-E, Shrestha PM, Malvankar NS, Liu F, Fan W, et al.  
484 Promoting interspecies electron transfer with biochar. *Sci Rep* 2014; **4**: 5019.
- 485 29. Wang O, Zheng S, Wang B, Wang W. Necessity of electrically conductive pili  
486 for methanogenesis with magnetite stimulation. *PeerJ* 2018; **2**: 1–14.
- 487 30. Shrestha PM, Rotaru A-E, Aklujkar M, Liu F, Shrestha M, Summers ZM, et al.  
488 Syntrophic growth with direct interspecies electron transfer as the primary  
489 mechanism for energy exchange. *Environ Microbiol Rep* 2013; **5**: 904–10.
- 490 31. Cord-Ruwisch R, Lovley DR, Schink B. Growth of *Geobacter sulfurreducens*  
491 with acetate in syntrophic cooperation with hydrogen-oxidizing anaerobic  
492 partners. *Appl Environ Microbiol* 1998; **64**: 2232–2236.
- 493 32. Lovley DR, Ueki T, Zhang T, Malvankar NS, Shrestha PM, Flanagan K a., et  
494 al. *Geobacter*: the microbe electric’s physiology, ecology, and practical  
495 applications. *Adv Microb Physiol* 2011; **59**: 1–100.
- 496 33. Holmes D, Shrestha PM, Rotaru A-E, Lovley DR. Transcriptomics analysis of  
497 direct interspecies electron transfer to *Methanosarcina barkeri*. *Submitted* 2018.
- 498 34. Holmes DE, Rotaru A, Ueki T, Shrestha PM, James G, Lovley DR. Electron  
499 and Proton Flux for Carbon Dioxide Reduction in *Methanosarcina barkeri*  
500 During Direct Interspecies Electron Transfer. 2018; **9**: 1–11.
- 501 35. Deutzmann JS, Spormann AM. Extracellular enzymes facilitate electron uptake  
502 in biocorrosion and bioelectrosynthesis. *MBio* 2015; **6**: e00496-15.
- 503 36. Karyakin AA, Morozov S V., Karyakina EE, Varfolomeyev SD, Zorin NA,  
504 Cosnier S. Hydrogen fuel electrode based on bioelectrocatalysis by the enzyme  
505 hydrogenase. *Electrochem commun* 2002; **4**: 417–420.
- 506 37. Partridge CDP, Yates MG. Effect of chelating agents on hydrogenase in  
507 *Azotobacter chroococcum*. Evidence that nickel is required for hydrogenase  
508 synthesis. *Biochem J* 1982; **204**: 339–344.

- 509 38. Rotaru A-E, Calbrese F, Stryhanyuk H, Musat F, Shrestha PM, Weber HS, et  
510 al. Conductive particles enable syntrophic acetate oxidation between *Geobacter*  
511 and *Methanosarcina* from coastal sediments. *MBio* 2018; **9**: 1–14.
- 512 39. Lovley DR, Phillips EJP. Rapid assay for microbially reducible ferric iron in  
513 aquatic sediments. *Appl Environ Microbiol* 1987; **53**: 1536–1540.
- 514 40. Meyer F, Paarmann D, D’Souza M, Olson R, Glass E, Kubal M, et al. The  
515 metagenomics RAST server – a public resource for the automatic phylogenetic  
516 and functional analysis of metagenomes. *BMC Bioinformatics* 2008; **9**: 386.
- 517 41. Quast C, Pruesse E, Yilmaz P, Gerken J, Schweer T, Yarza P, et al. The SILVA  
518 ribosomal RNA gene database project: improved data processing and web-  
519 based tools. *Nucleic Acids Res* 2012; **41**: D590–D596.
- 520 42. Cole JR, Wang Q, Fish JA, Chai B, McGarrell DM, Sun Y, et al. Ribosomal  
521 Database Project: data and tools for high throughput rRNA analysis. *Nucleic*  
522 *Acids Res* 2014; **42**: D633–D642.
- 523 43. DeSantis TZ, Hugenholtz P, Larsen N, Rojas M, Brodie EL, Keller K, et al.  
524 Greengenes, a chimera-checked 16S rRNA gene database and workbench  
525 compatible with ARB. *Appl Environ Microbiol* 2006; **72**: 5069–72.
- 526 44. Tatusova T, Ciufu S, Federhen S, Fedorov B, McVeigh R, O’Neill K, et al.  
527 Update on RefSeq microbial genomes resources. *Nucleic Acids Res* 2015; **43**:  
528 D599–D605.
- 529 45. Raskin L, Stromley JM, Rittmann BE, Stahl DA. Group-specific 16S rRNA  
530 hybridization probes to describe natural communities of methanogens. *Appl*  
531 *Environ Microbiol* 1994; **60**: 1232–40.
- 532 46. Yu Y, Lee C, Kim J, Hwang S. Group-specific primer and probe sets to detect  
533 methanogenic communities using quantitative real-time polymerase chain  
534 reaction. *Biotechnol Bioeng* 2005; **89**: 670–679.
- 535 47. Kears M, Moir R, Wilson A, Stones-Havas S, Cheung M, Sturrock S, et al.  
536 Geneious Basic: An integrated and extendable desktop software platform for  
537 the organization and analysis of sequence data. *Bioinformatics* 2012; **28**: 1647–  
538 1649.
- 539 48. Araujo JC, Téran FC, Oliveira RA, Nour EAA, Montenegro MAP, Campos JR,  
540 et al. Comparison of hexamethyldisilazane and critical point drying treatments  
541 for SEM analysis of anaerobic biofilms and granular sludge. *J Electron*  
542 *Microsc (Tokyo)* 2003; **52**: 429–33.



- 543 49. Usher KM, Kaksonen a. H, Bouquet D, Cheng KY, Geste Y, Chapman PG, et  
544 al. The role of bacterial communities and carbon dioxide on the corrosion of  
545 steel. *Corros Sci* 2015; **98**: 354–365.
- 546 50. Nevin KP, Hensley SA, Franks AE, Summers ZM, Ou J, Woodard TL, et al.  
547 Electrosynthesis of organic compounds from carbon dioxide is catalyzed by a  
548 diversity of acetogenic microorganisms. *Appl Environ Microbiol* 2011; **77**:  
549 2882–2886.
- 550 51. Jetten MSM, Stams AJM, Zehnder AJB. Methanogenesis from acetate: a  
551 comparison of the acetate metabolism in *Methanothrix soehngenii* and  
552 *Methanosarcina* spp. *FEMS Microbiol Lett* 1992; **88**: 181–198.
- 553 52. Simankova M V., Parshina SN, Tourova TP, Kolganova T V., Zehnder AJB,  
554 Nozhevnikova AN. *Methanosarcina lacustris* sp. nov., a New Psychrotolerant  
555 Methanogenic Archaeon from Anoxic Lake Sediments. *Syst Appl Microbiol*  
556 2001; **24**: 362–367.
- 557 53. Skovhus LT, Enning D, Lee JS. Microbiologically Influenced Corrosion in the  
558 Upstream Oil and Gas Industry. 2017. CRC Press, Boca Raton, FL.
- 559 54. Philips J, Monballyu E, Georg S, De Paepe K, PrévotEAU A, Rabaey K, et al.  
560 An *Acetobacterium* strain isolated with metallic iron as electron donor  
561 enhances iron corrosion by a similar mechanism as *Sporomusa sphaeroides*.  
562 *FEMS Microbiol Ecol* 2018; **95**: fiy222.
- 563 55. Lienemann M, Deutzmann JS, Milton R, Sahin M, Spormann AM. Mediator-  
564 free enzymatic electrosynthesis of formate by the *Methanococcus maripaludis*  
565 heterodisulfide reductase supercomplex. *Bioresour Technol* 2018; **Accepted**.
- 566 56. Nevin KP, Woodard TL, Franks AE. Microbial Electrosynthesis : feeding  
567 microbes electricity to convert carbon dioxide and water to multicarbon  
568 extracellular organic compounds. *MBio* 2010; **1**: 1–4.
- 569 57. Zaybak Z, Logan BE, Pisciotta JM. Bioelectrochemistry Electrotrophic activity  
570 and electrosynthetic acetate production by *Desulfobacterium autotrophicum*  
571 HRM2. *Bioelectrochemistry* 2018; **123**: 150–155.
- 572 58. Volker M, Chowdhury N, Basen M. Electron Bifurcation : A Long- Hidden  
573 Energy-Coupling Mechanism. *Annu Rev Microbiol* 2018; 331–353.
- 574 59. Schuchmann K, Müller V. Energetics and application of heterotrophy in  
575 acetogenic bacteria. *Appl Environ Microbiol* 2016; **82**: 4056–4069.
- 576 60. Mehanna M, Rouvre I, Delia M-L, Feron D, Bergel A, Basseguy R. Discerning

- 577 different and opposite effects of hydrogenase on the corrosion of mild steel in  
578 the presence of phosphate species. *Bioelectrochemistry* 2016; **111**: 31–40.
- 579 61. Mehanna M, Basseguy R, Delia ML, Girbal L, Demuez M, Bergel A. New  
580 hypotheses for hydrogenase implication in the corrosion of mild steel.  
581 *Electrochim Acta* 2008; **54**: 140–147.
- 582 62. Kral TA, Brink KM, Miller SL, McKay CP. Hydrogen consumption by  
583 methanogens on the early Earth. *Orig Life Evol Biosph* 1998; **28**: 311–319.
- 584 63. Lovley DR. Minimum threshold for hydrogen metabolism in methanogenic  
585 bacteria. *Appl Environ Microbiol* 1985; **49**: 1530–1531.
- 586
- 587

588 **FIGURES**

589 **Fig. 1.**

590 Anticipated commensal interaction between an Fe<sup>0</sup>-corroding *Clostridium*-acetogen  
591 and an acetate-utilizing *Methanosarcina*-methanogen. ❶ Indicates a direct mechanism  
592 of electron uptake. ❷ Indicates a mechanism of uptake based on abiotic-H<sub>2</sub>.  
593

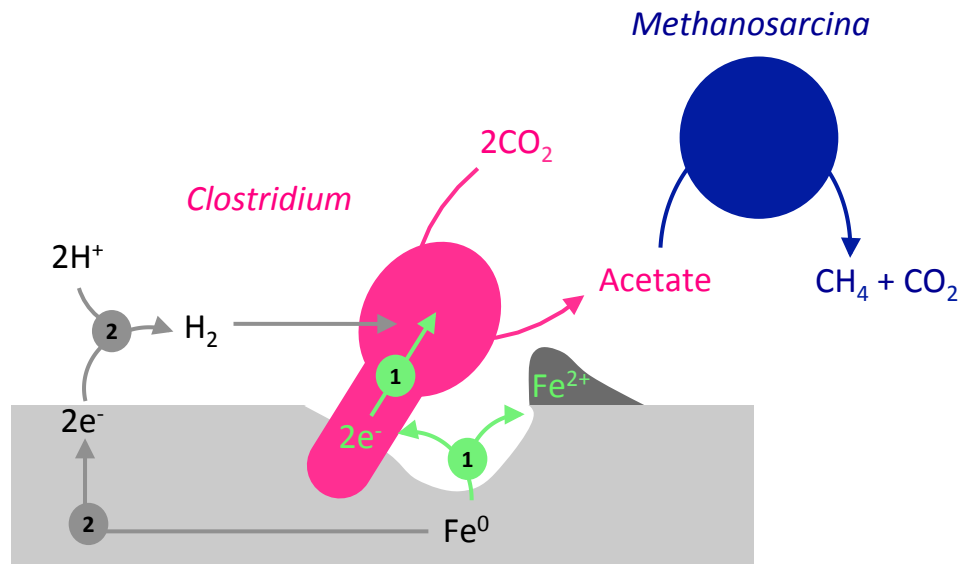

594

595

596 **Fig. 2.**  
597 Incubations with  $\text{Fe}^0$  as sole electron donor in the presence (a) or absence (b) of a  
598 methanogenic community from the Baltic Sea. The top left panels show initial  
599 electron recoveries into products (methane and acetate) in the original Baltic slurries  
600 incubated with  $\text{Fe}^0$ . Recoveries are presented as mM electron equivalents (mM eq)  
601 considering that to make one mol methane/acetate requires 8 mols electrons ( $n=3$ ).  
602 The top right panel (c) shows corrosion estimates from ferrous iron ( $\text{Fe}^{2+}$ )  
603 determination. The Baltic community incubated on  $\text{Fe}^0$ , was now at its eight  
604 consecutive transfer and accumulated  $\text{Fe}^{2+}$  to levels higher than abiotic controls,  
605 independent of the addition of inhibitors specific for acetogens and methanogens.  
606 Bottom panel (d) shows images of steel plates after three months of incubation in the  
607 presence or absence of the abiotic media, the Baltic-community, the Baltic-acetogens  
608 (by specific inhibition of the methanogens), and the Baltic-methanogens (by blocking  
609 the bacteria with antibiotics).

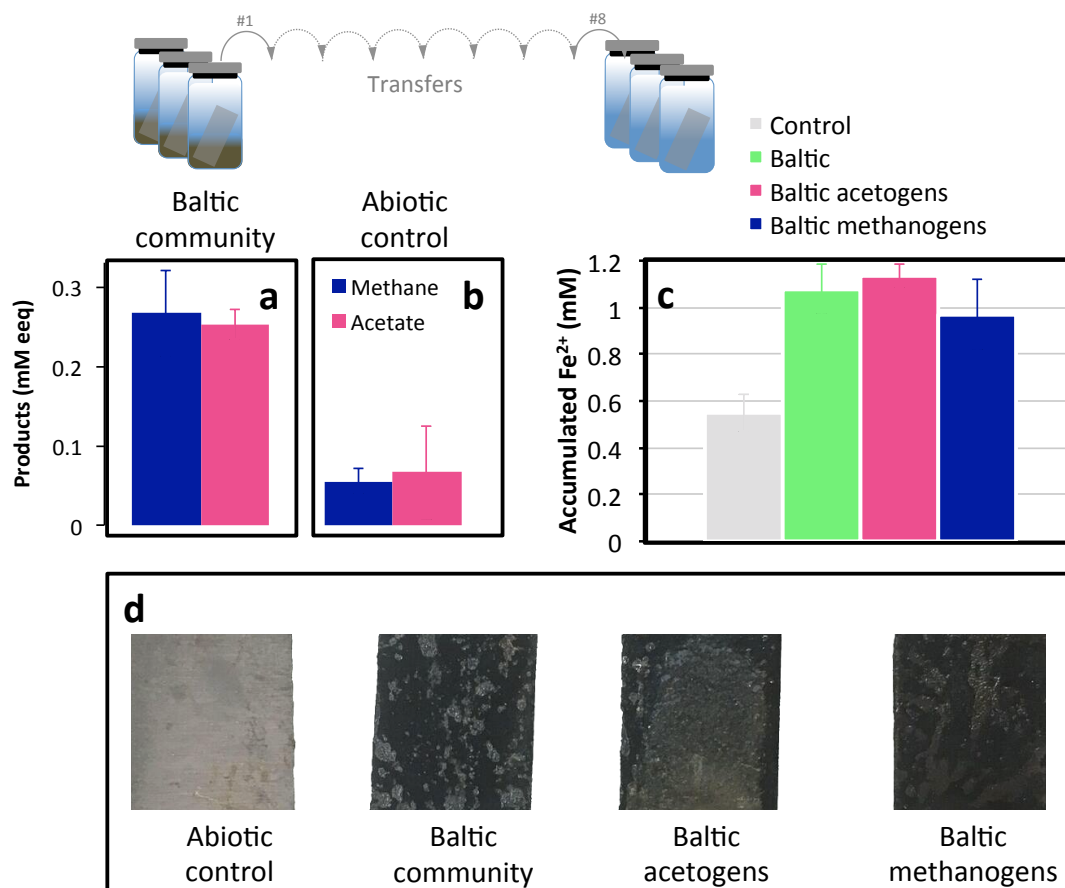

610

611 **Fig. 3.**

612 Baltic corrosive community (5<sup>th</sup> transfer) established on Fe<sup>0</sup>-coupons for 3 months.

613 Three morphotypes were observed: ❶ a rod-shaped cell with a bulging head –

614 resembling a terminal endospore-forming *Clostridium*, ❷ a sarcina-like cell

615 resembling the rosette-forming *Methanosarcina* species and ❸ a vibrio-like cell

616 possibly a *Desulfovibrio*.

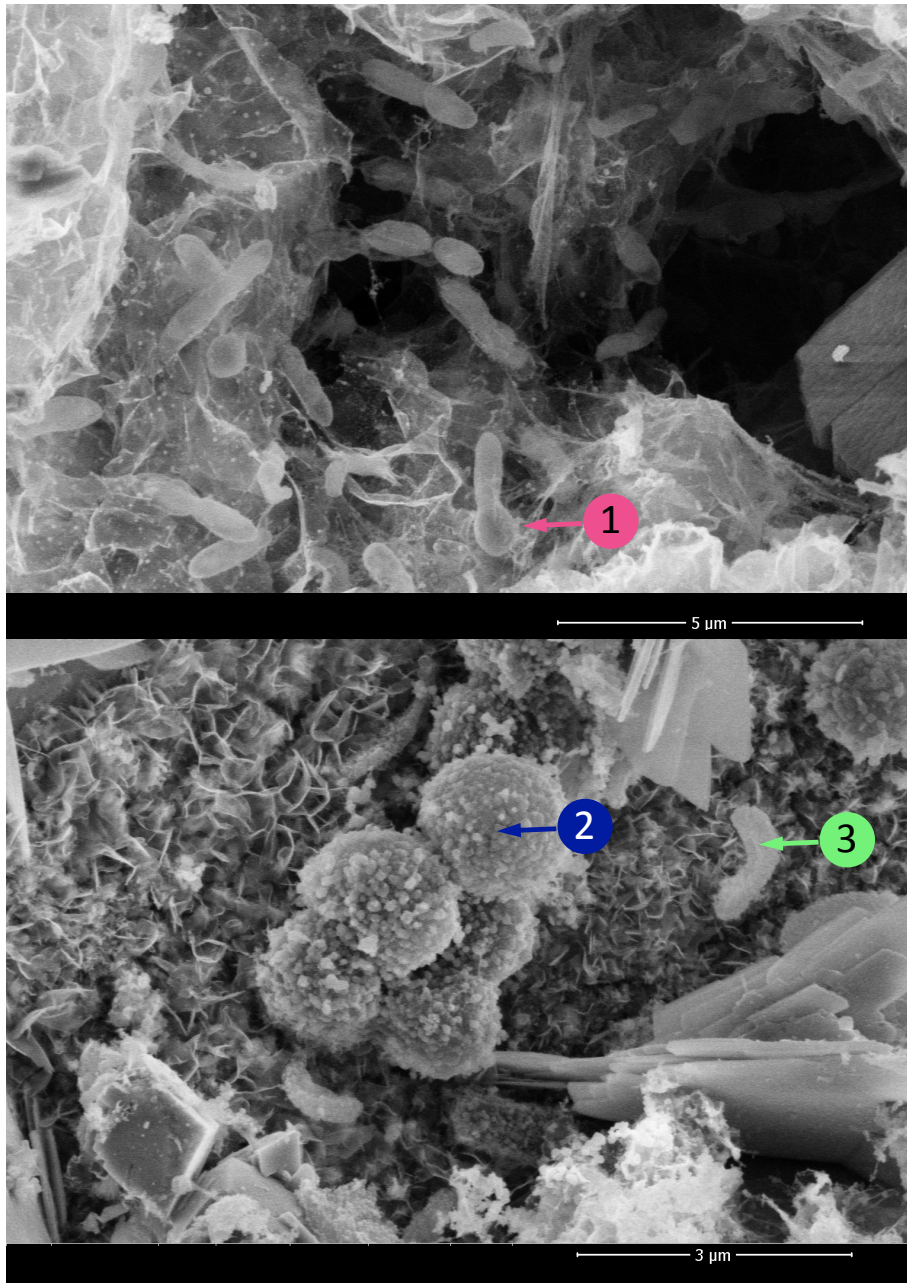

617

618 **Fig. 4.**

619 Whole-metagenome phylogeny of a community enriched on Fe<sup>0</sup> for five successive  
620 transfers showing the major bacterial (a) and archaeal (b) phylotypes. For Bacteria we  
621 only show the phylotypes above 0.25% abundance. Other Bacteria and Other  
622 Archaea, include both non-abundant and unassigned species.

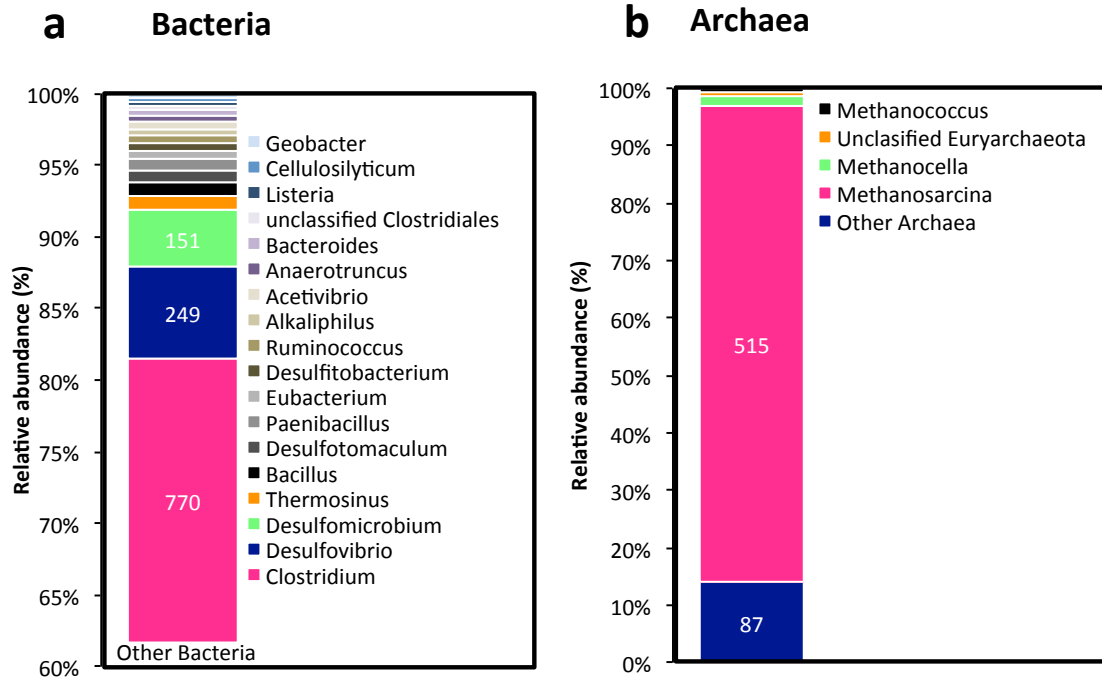

623

624

625 **Fig. 5.**

626 **Fig. 7.** Maximum likelihood tree of a 16S rRNA gene sequence of a Baltic-  
627 *Methanosarcina* capable of Fe<sup>0</sup> corrosion, but incapable of acetoclastic  
628 methanogenesis over the course of 60 days. This was also aligned against a Baltic-  
629 *Methanosarcina* sequence enriched on GAC along with Baltic-*Geobacter* [38]. Scale  
630 bar represents the average number of nucleotide substitutions per site.

631

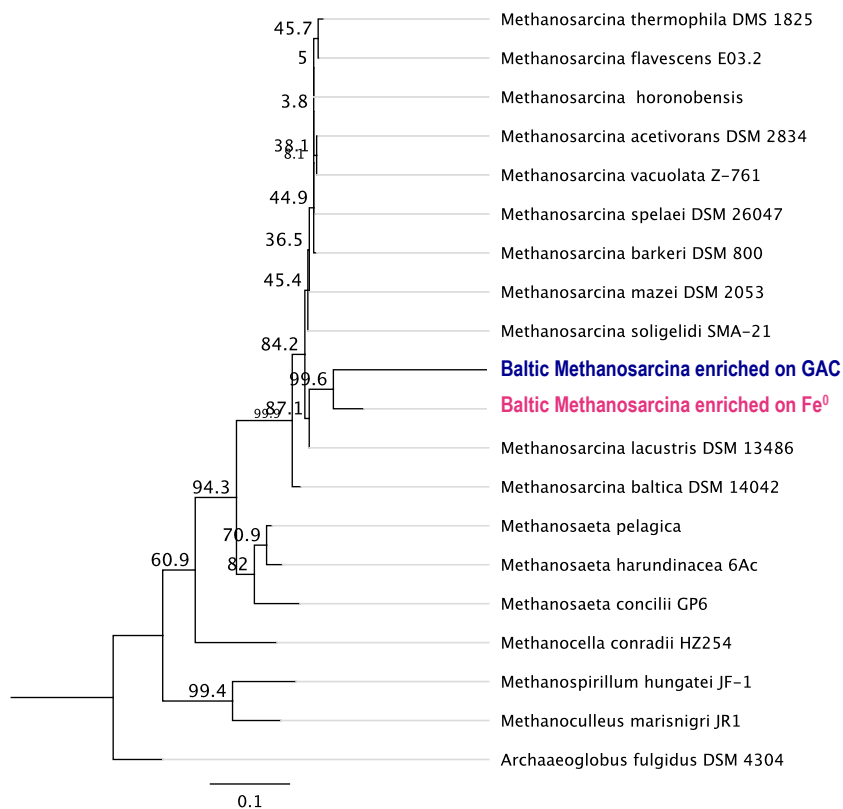

632 **Fig. 6.**  
 633 Electron recovery (as mM electron equivalents) in products, considering that 2 mM  
 634 electrons are required to make 1 mM H<sub>2</sub> and 8 mM electrons are required to make 1  
 635 mM acetate or methane according to the reactions in the right upper panel. (a) In  
 636 abiotic controls electrons are recovered as H<sub>2</sub>. (b) The whole community grown on  
 637 Fe<sup>0</sup> for eight transfers recovered electrons as methane and acetate. (c) Inhibition of all  
 638 bacteria (including acetogens) with a cocktail of antibiotics (kanamycin and  
 639 ampicillin) led to the survival of methanogens, which produced more methane than  
 640 the mixed-Baltic community (dotted line/b) (d) Specific inhibition of methanogens  
 641 with 2-bromoethanesulfonate, led to the persistence of a community of acetogens,  
 642 which produced more acetate than the mixed-Baltic community (dotted line/b). (n>5)

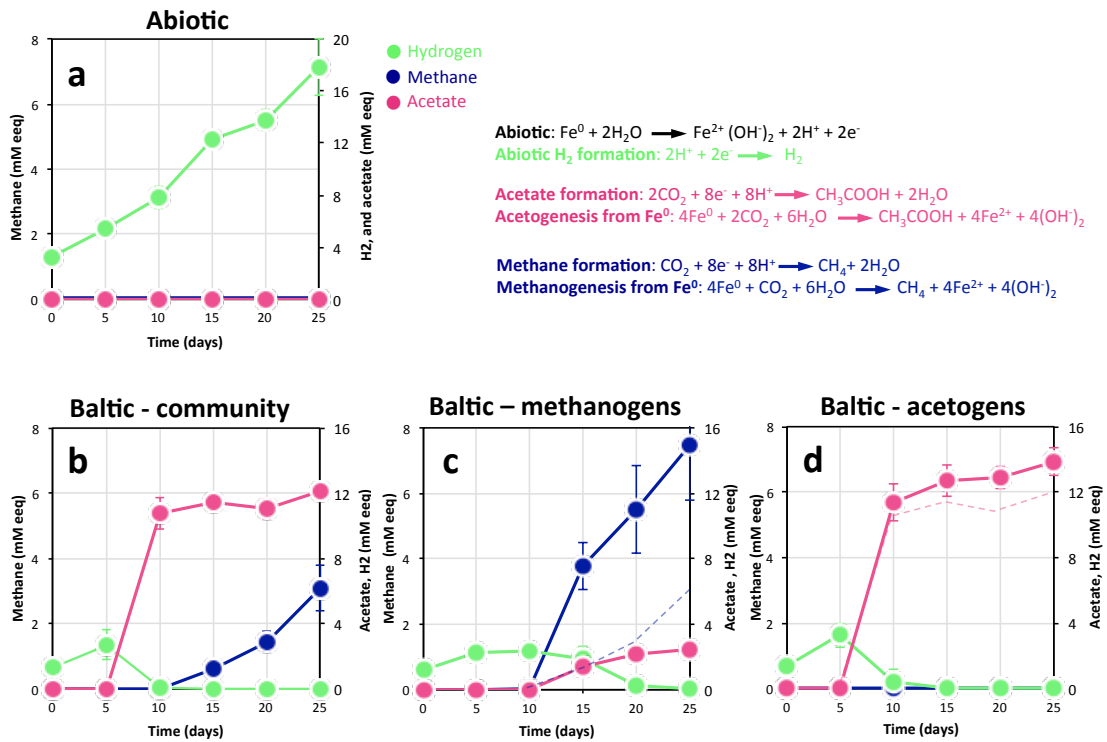

643



644 **Fig. 7.**

645 Model of the competitive interaction between an Fe<sub>0</sub>-corroding *Clostridium*-acetogen  
646 and an Fe<sub>0</sub>-corroding *Methanosarcina*-methanogen. ❶ Indicates a direct mechanism of  
647 electron uptake. ❷ Indicates a mechanism of uptake based on abiotic-H<sub>2</sub>. ❸ Indicates  
648 extracellular enzyme-mediated H<sub>2</sub>-evolution.

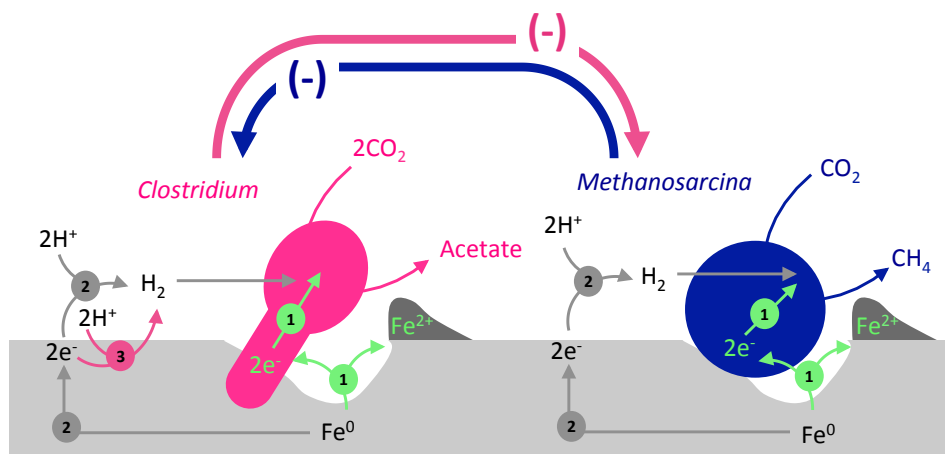

649

650

651 **Fig. 8.**

652 Impact of spent-filtrate spiking on acetogenesis (a) and methanogenesis (b) in freshly-  
653 prepared Fe<sup>0</sup>-Baltic communities (n=10). Dashed lines show the trends for product  
654 formation by the acetogens-alone and methanogens-alone when their competitors  
655 were specifically inhibited. Dotted lines show the trends for product formation when  
656 the acetogens and methanaogens were competing with one another.

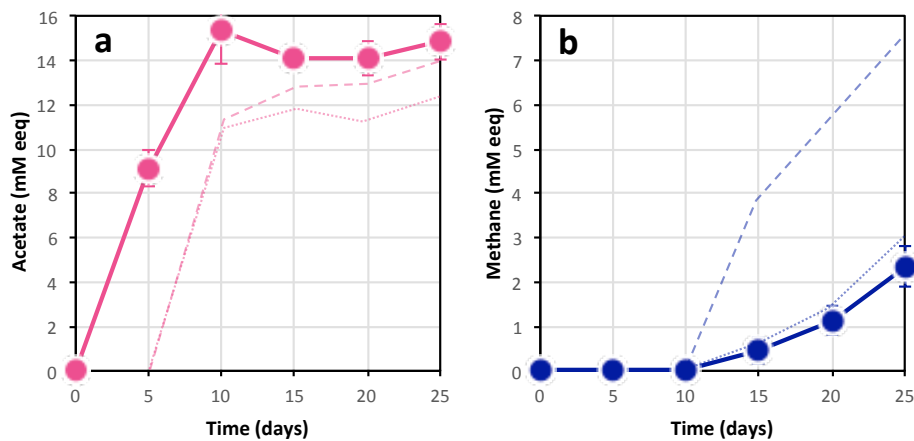

Source: https://www.biorxiv.org/content/10.1101/530386v1.full.pdf
